# Supplementary material for: Microendemicity in the northern Hajar Mountains of Oman and the United Arab Emirates with the description of two new species of geckos of the genusAsaccus(Squamata: Phyllodactylidae)
Source: PeerJ journal article supplement (doi:10.7717/peerj.2371), 2016-08-18

A) *c-mos*

- *Asaccus gardneri* sp. nov.
- *Asaccus caudivolvulus*
- *Asaccus margaritae* sp. nov.

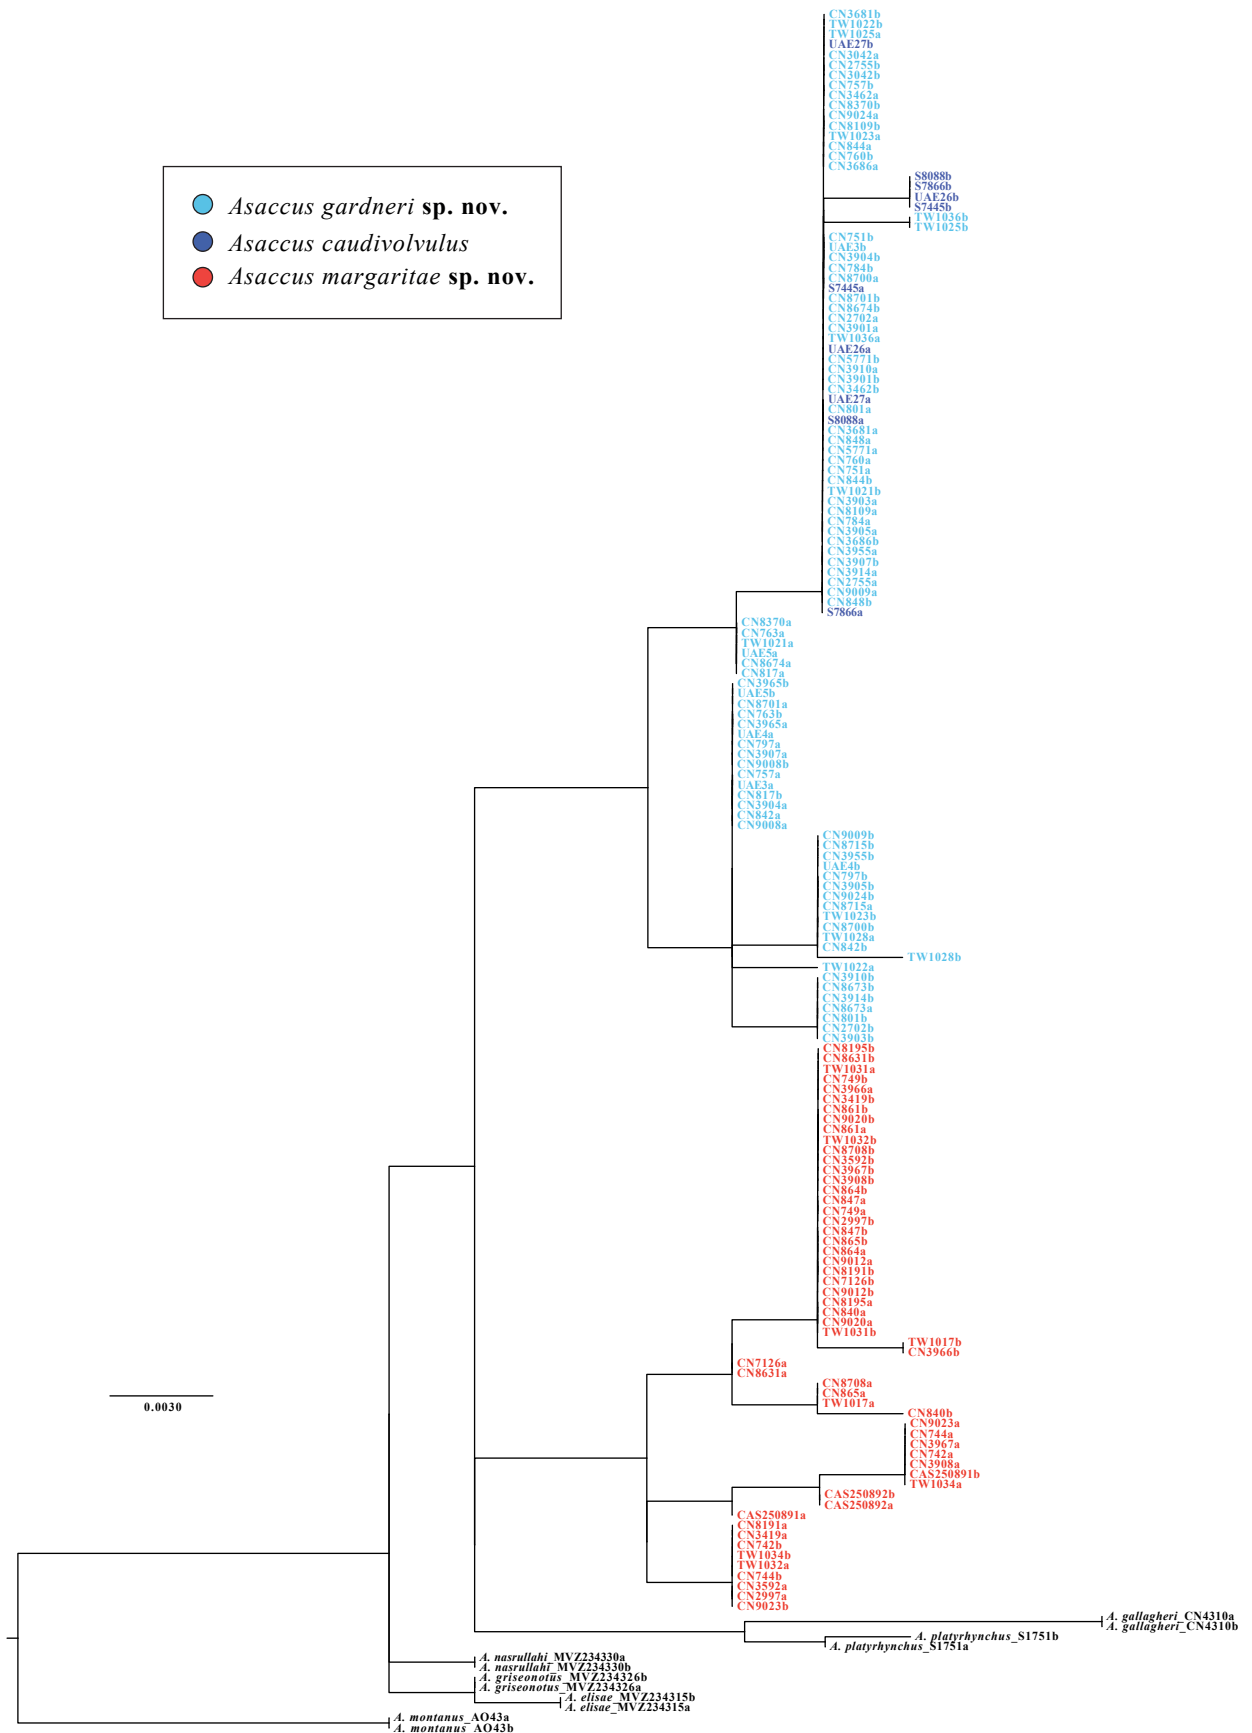

B) MCIR

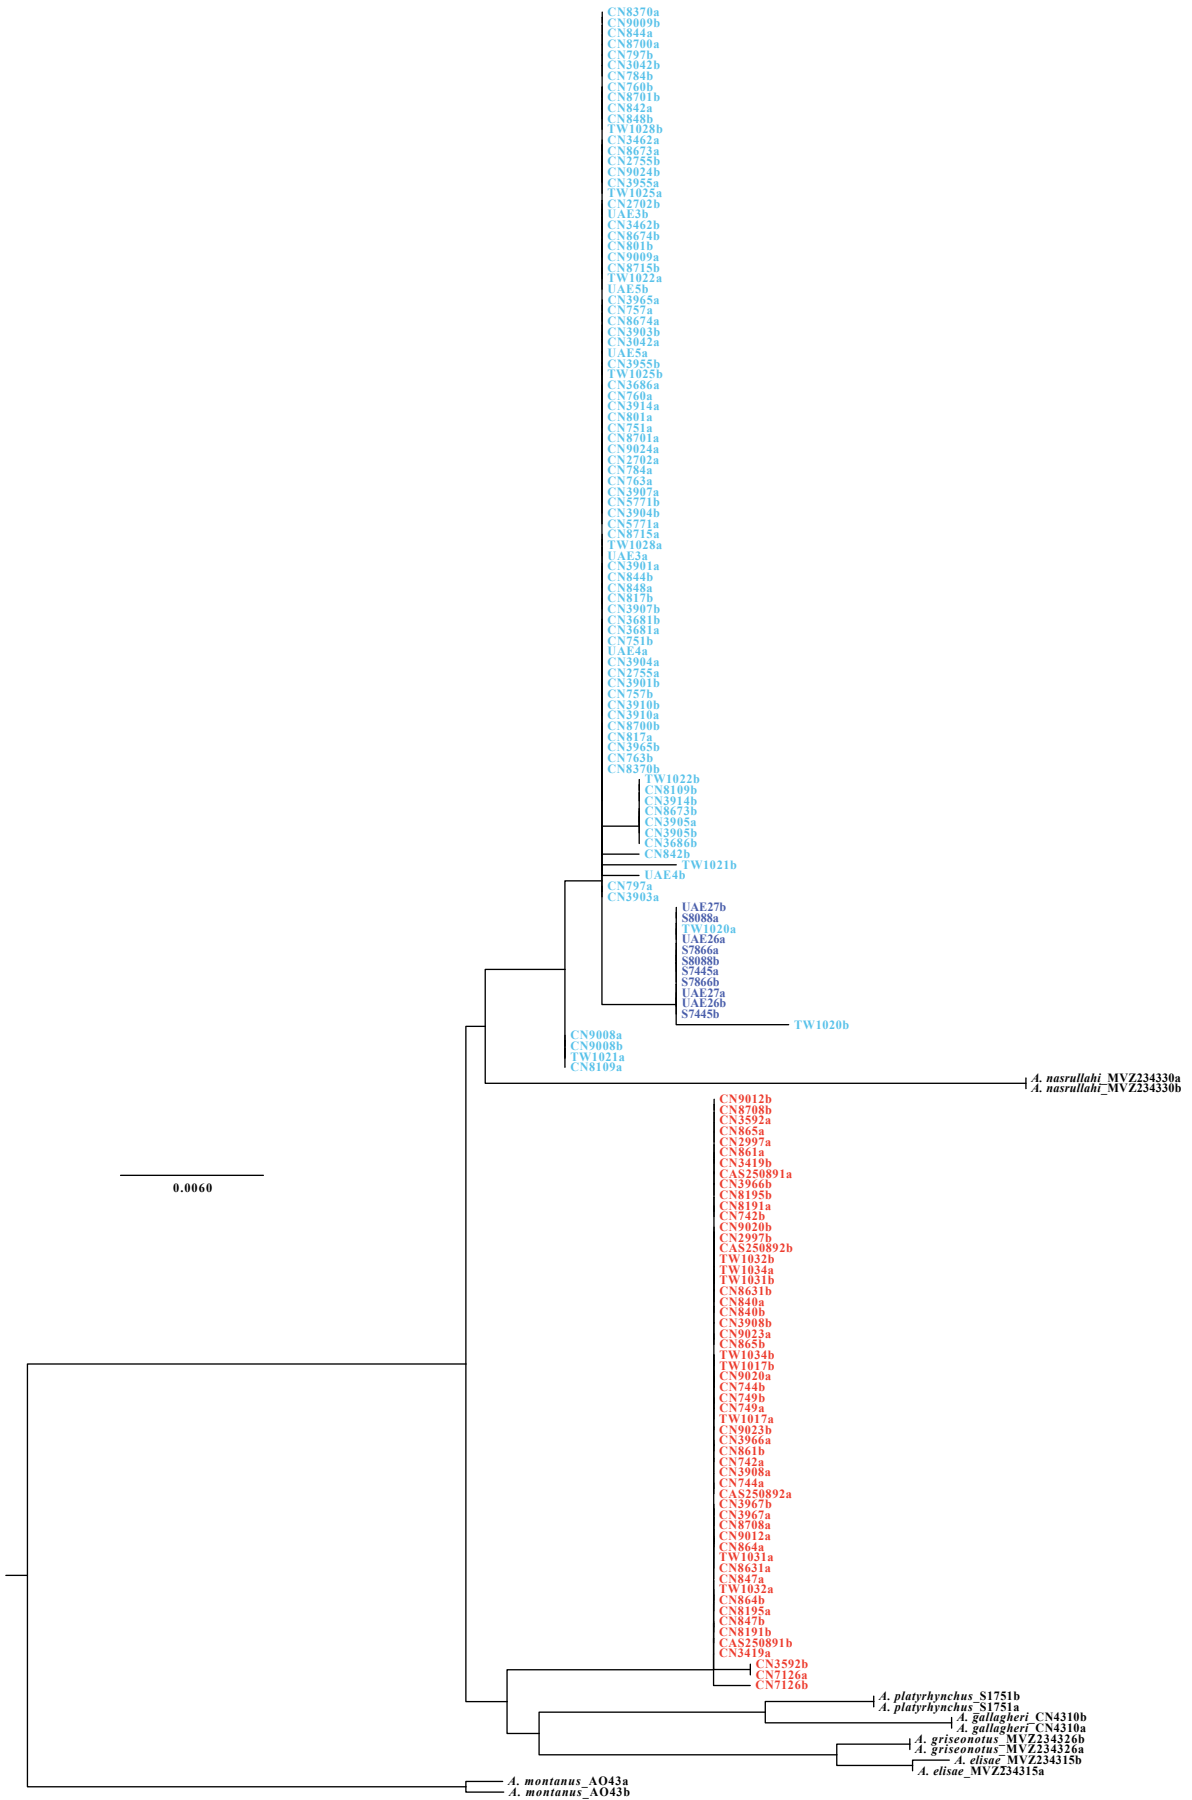

C) ACM4

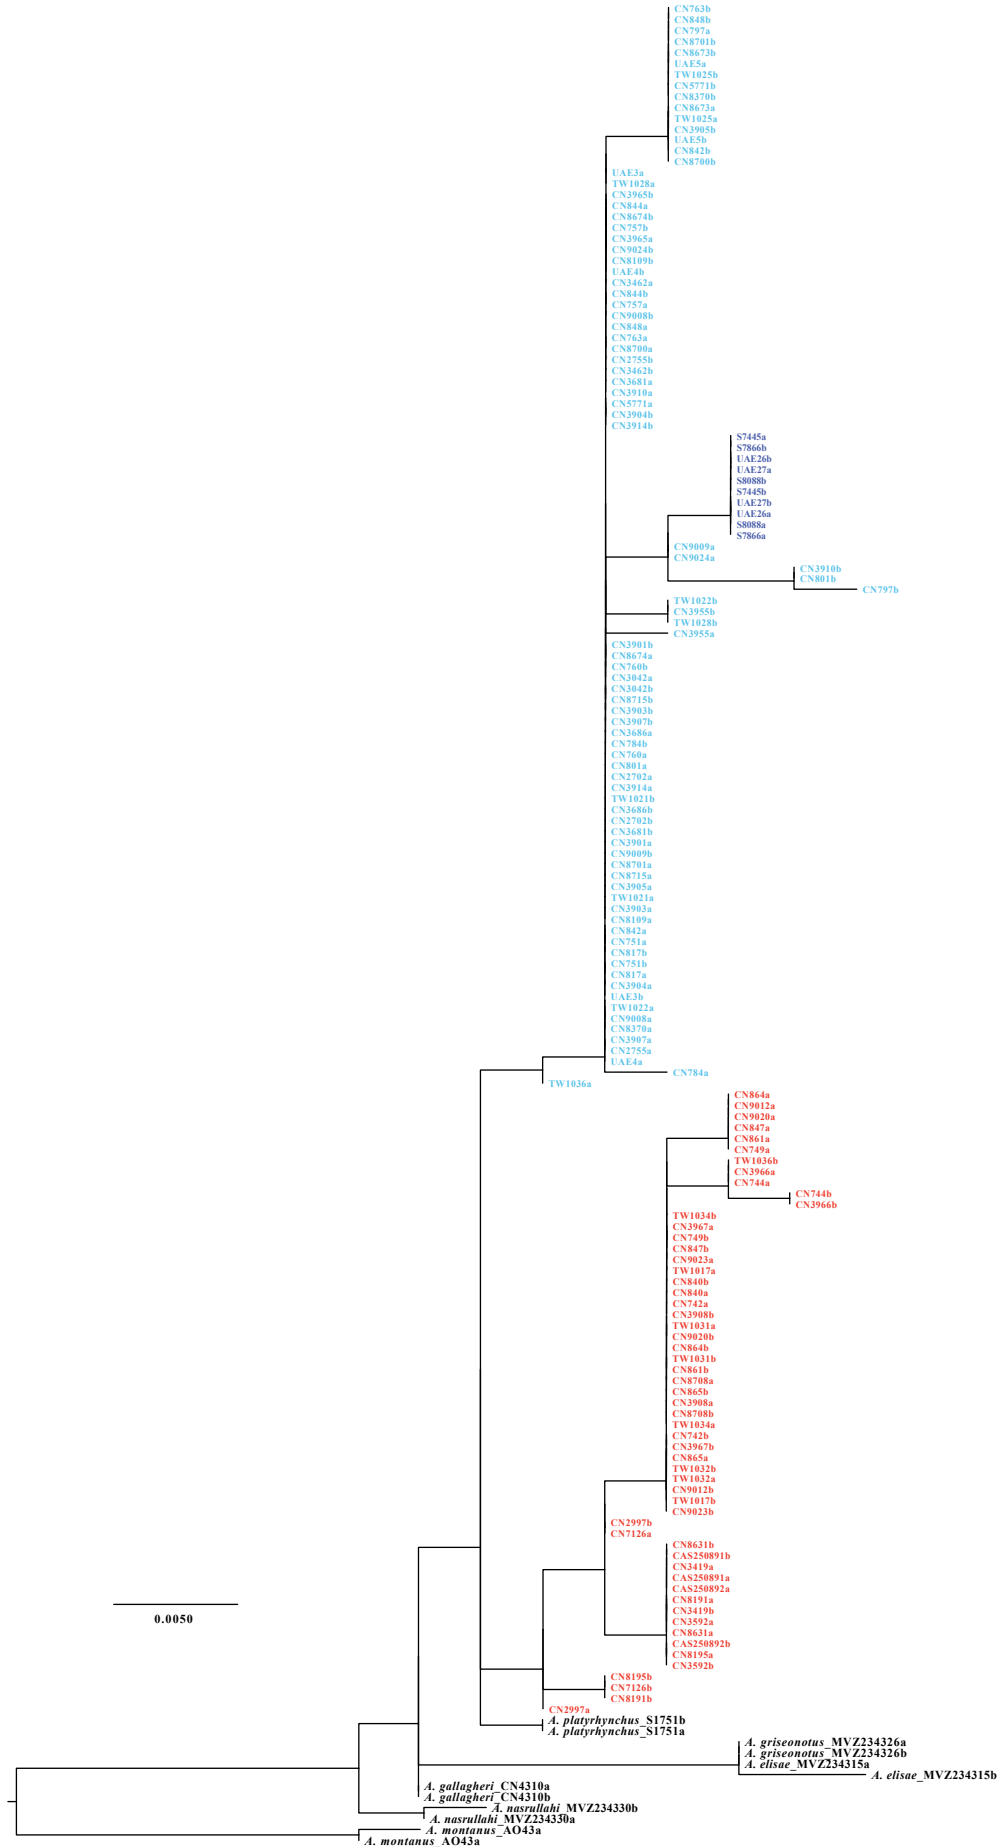

Supplement: FigureS2.pdf [file FigureS2.pdf]
